# Supplementary material for: Hypoxia-autophagy axis induces VEGFA by peritoneal mesothelial cells to promote gastric cancer peritoneal metastasis through an integrin α5-fibronectin pathway
Source: PubMed Central journal article supplement (PMC7576728; doi:10.1186/s13046-020-01703-x), 2020-10-20

**A**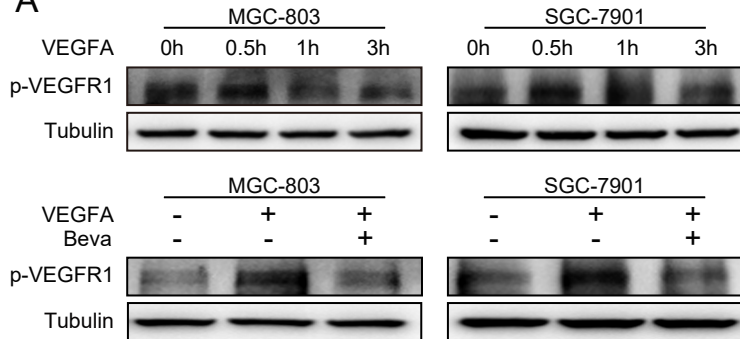**B**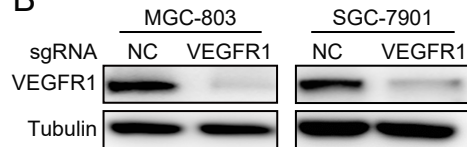**C**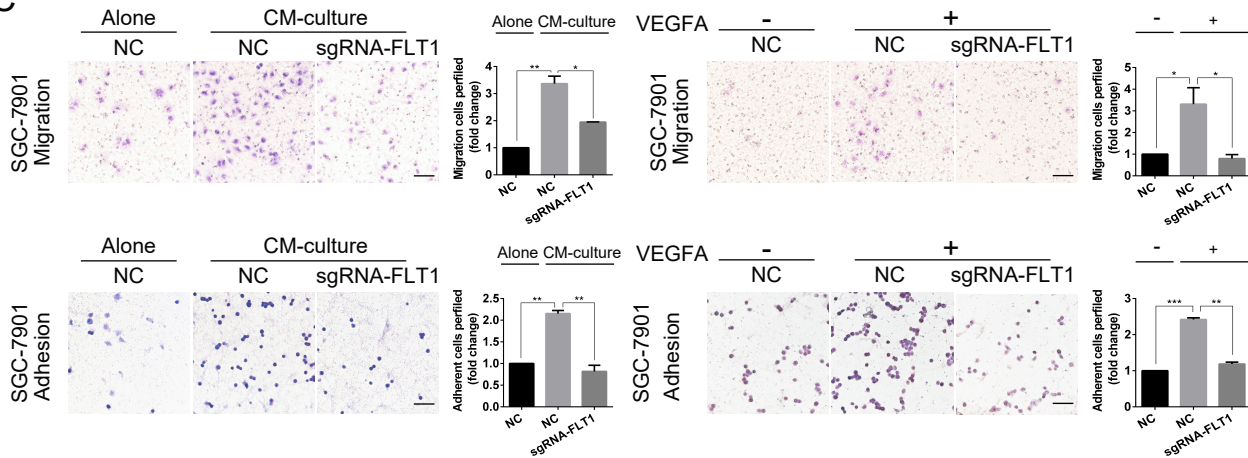

Supplement: 13046_2020_1703_MOESM3_ESM.pdf [file 13046_2020_1703_MOESM3_ESM.pdf]
